# Supplementary material for: Habitual carbohydrate intake is not correlated with circulating β-hydroxybutyrate levels in pregnant women with overweight and obesity at 28 weeks' gestation
Source: PubMed Central journal article supplement (PMC10789657; doi:10.1007/s00125-023-06044-w), 2023-11-16
Supplement: 125_2023_6044_MOESM1_ESM.pdf [file 125_2023_6044_MOESM1_ESM.pdf]

ESM table 1. Relative dietary intake across pregnancy until 28 weeks' gestation (mg nutrient/kJ)

|                             | Low carbohydrate | High carbohydrate | P-value |
|-----------------------------|------------------|-------------------|---------|
| N                           | 53               | 53                |         |
| Carbohydrate (mg/kJ)        | 24.3 ± 2.6       | 25.5 ± 2.8        | 0.02    |
| Sugars (mg/kJ)              | 11.5 ± 2.7       | 12.1 ± 2.7        | 0.26    |
| Starch (mg/kJ)              | 12.6 ± 2.3       | 13.3 ± 2.1        | 0.14    |
| Fibre (mg/kJ)               | 2.8 ± 0.7        | 2.8 ± 0.6         | 0.54    |
| Protein (mg/kJ)             | 11.6 ± 1.3       | 11.6 ± 1.5        | 0.99    |
| Total fat (mg/kJ)           | 10.7 ± 1.0       | 10.2 ± 1.1        | 0.007   |
| Saturated fat (mg/kJ)       | 4.7 ± 4.5        | 4.4 ± 0.6         | 0.01    |
| Polyunsaturated fat (mg/kJ) | 1.4 ± 0.5        | 1.3 ± 0.3         | 0.24    |
| Monounsaturated fat (mg/kJ) | 3.7 ± 0.4        | 3.6 ± 0.5         | 0.38    |

ESM table 2. Participant characteristics at 28 weeks' gestation grouped by B-OHB levels below (LB) or above (HB) the median of 65.4  $\mu$ M.

|                                               | LB               | HB               | P-value |
|-----------------------------------------------|------------------|------------------|---------|
| N                                             | 47               | 48               | ND      |
| Maternal age                                  | 32 (28-34)       | 31 (29-36)       | 0.56    |
| Ethnicity Caucasian N (%)                     | 43 (92)          | 46 (96)          | 0.44    |
| Study allocation Probiotics/Placebo (N)       | 25 (53)/22 (47)  | 23 (48)/25 (48)  | 0.68    |
| Parity < 1 (N (%))                            | 13 (28)          | 6 (13)           | 0.08    |
| Maternal BMI at 28 weeks (kg/m <sup>2</sup> ) | 32.8 (30.2-39.7) | 33.3 (30.0-38.0) | 0.91    |
| SBP (mmHg)                                    | 110 (105-115)    | 110 (104-120)    | 0.62    |
| DBP (mmHg)                                    | 65 (60-70)       | 68 (60-72)       | 0.48    |
| OGTT-Fasting (mmol/l)                         | 4.2 (3.9-4.5)    | 4.2 (4.0-4.5)    | 0.72    |
| OGTT-1 hour (mmol/l)                          | 6.7 (5.7-8.0)    | 7.6 (6.8-8.1)    | 0.02    |
| OGTT-2 hour (mmol/l)                          | 6.0 (4.9-7.3)    | 6.3 (5.7-7.2)    | 0.20    |
| Fasting insulin (pmol/l)                      | 57.3 (36.5-91.5) | 49.8 (34.5-69.0) | 0.06    |
| Fasting C-peptide (nmol/l)                    | 0.8 (0.7-1.1)    | 0.7 (0.6-0.9)    | 0.07    |
| Fasting cholesterol (mmol/l)                  | 6.8 (5.7-7.8)    | 6.6 (6.1-7.4)    | 0.67    |
| Fasting HDL cholesterol (mmol/l)              | 1.7 (1.5-2.0)    | 1.8 (1.5-2.1)    | 0.58    |
| Fasting LDL cholesterol (mmol/l)              | 3.9 (3.1-4.6)    | 3.8 (3.3-4.5)    | 0.60    |
| Fasting VLDL cholesterol (mmol/l)             | 1.0 (0.7-1.1)    | 0.9 (0.7-1.2)    | 0.63    |
| Fasting triglycerides (mmol/l)                | 2.2 (1.6-2.5)    | 2.0 (1.6-2.6)    | 0.56    |
| HOMA-IR                                       | 1.8 (1.1-2.9)    | 1.5 (1.0-2.1)    | 0.07    |
| HOMA-B                                        | 276 (180-344)    | 223 (163-311)    | 0.22    |
| GDM (N (%))                                   | 1 (2)            | 5 (10)           | 0.20    |
| HDP (N)                                       | 2 (4)            | 6 (13)           | 0.27    |
| GWG (kg)*                                     | 7.2 (4.4-11.2)   | 9.0 (5.0-13.0)   | 0.23    |

|                                         |                  |                  |      |
|-----------------------------------------|------------------|------------------|------|
| Gestational Age at delivery (weeks)     | 40.1 (39.3-40.9) | 39.4 (38.7-40.8) | 0.10 |
| Infant gender Female (N(%))/Male (N(%)) | 22 (47)/25 (53)  | 27 (56)/21(44)   | 0.41 |
| Infant birth weight (g)                 | 3686 (3464-4013) | 3670 (3391-3984) | 0.83 |
| SGA (<10 <sup>th</sup> centile) (N)     | 0                | 1                | 0.99 |
| LGA (>90 <sup>th</sup> centile) (N)     | 6                | 11               | 0.42 |
| Infant length (cm)                      | 53.0 (50.8-54.0) | 52.5 (50.0-54.0) | 0.94 |
| Infant head circumference (cm)          | 35.0 (34.0-36.0) | 36.0 (34.0-36.5) | 0.20 |

DBP, diastolic blood pressure; GDM, gestational diabetes mellitus; GWG, gestational weight gain; HB, high B-OHB; HDP, hypertensive disorders of pregnancy; HOMA-B, homeostatic assessment of b-cell function; HOMA-IR, homeostatic assessment of insulin resistance; LB, low B-OHB ; LGA, large for gestational age; N, number; OGTT, oral glucose tolerance test; SBP, systematic blood pressure; SGA, small for gestational age; \*, across gestation. Data displayed as median (IQR)

ESM table 3. Dietary intake in pregnancy until 28 weeks' gestation grouped by B-OHB levels below (LB) or above (HB) the median of 65.4  $\mu$ M.

|                           | LB               | HB               | P-value |
|---------------------------|------------------|------------------|---------|
| N                         | 46*              | 46               | ND      |
| Overall Energy (kJ/d)     | 5979 (4743-8238) | 6323 (4974-7511) | 0.34    |
| Carbohydrate (g/d)        | 148 (123-195)    | 160 (130-193)    | 0.34    |
| Sugars (g/d)              | 71 (51-100)      | 74 (57-99)       | 0.53    |
| Starch (g/d)              | 79 (59-99)       | 84 (68-115)      | 0.27    |
| Fibre (g/d)               | 16 (12-23)       | 18 (14-22)       | 0.27    |
| Protein (g/d)             | 71 (54-103)      | 72 (53-94)       | 0.90    |
| Total fat (g/d)           | 61 (46-88)       | 68 (51-84)       | 0.29    |
| Saturated fat (g/d)       | 27 (21-35)       | 30 (25-74)       | 0.26    |
| Polyunsaturated fat (g/d) | 8 (6-10)         | 8 (6-11)         | 0.5     |
| Monounsaturated fat (g/d) | 21 (16-31)       | 23 (17-30)       | 0.34    |

N, number; ND, not determined; \*, no dietary data available from 1 participant in the LB group  
Data presented as median (IQR)

ESM table 4. Participant characteristics at 28-weeks gestation and correlation with B-OHB levels in all participants (normoglycaemic and with GDM)

|                                               | Spearman's rho (95%CI) | P-value |
|-----------------------------------------------|------------------------|---------|
| Maternal age                                  | 0.09 (-0.12 – 0.29)    | 0.37    |
| Maternal BMI at 28 weeks (kg/m <sup>2</sup> ) | 0.06 (-0.15 – 0.27)    | 0.56    |
| SBP (mmHg)                                    | 0.14 (-0.07 – 0.34)    | 0.17    |
| DBP (mmHg)                                    | 0.13 (-0.08 – 0.33)    | 0.21    |
| OGTT-Fasting (mmol/l)                         | 0.12 (-0.09 – 0.32)    | 0.25    |
| OGTT-1 hour (mmol/l)                          | 0.25 (0.04 – 0.43)     | 0.02    |
| OGTT-2 hour (mmol/l)                          | 0.12 (-0.09 – 0.32)    | 0.27    |
| Fasting insulin (mU/L)                        | -0.15 (-0.35 – 0.07)   | 0.16    |
| Fasting cholesterol (mmol/l)                  | -0.03 (-0.18 – 0.24)   | 0.75    |
| Fasting HDL cholesterol (mmol/l)              | 0.03 (-0.18 – 0.24)    | 0.76    |
| Fasting LDL cholesterol (mmol/l)              | 0.04 (-0.17 – 0.24)    | 0.72    |
| Fasting VLDL cholesterol (mmol/l)             | 0.02 (-0.23 – 0.19)    | 0.82    |
| Fasting triglycerides (mmol/l)                | -0.03 (-0.24 – 0.18)   | 0.77    |
| HOMA-IR                                       | -0.15 (-0.35 – 0.07)   | 0.17    |
| HOMA-B                                        | -0.05 (-0.26 – 0.17)   | 0.64    |
| GWG (kg)*                                     | 0.09 (-0.12 – 0.29)    | 0.39    |
| Infant birth weight (g)                       | -0.06 (-0.26 – 0.15)   | 0.59    |
| Infant birth length (cm)                      | -0.03 (-0.25 – 0.18)   | 0.76    |
| Infant head circumference (cm)                | 0.06 (-0.16 – 0.27)    | 0.60    |

DBP, diastolic blood pressure; GDM, gestational diabetes mellitus; GWG, gestational weight gain; HB, high B-OHB; HDP, hypertensive disorders of pregnancy; HOMA-B, homeostatic assessment of b-cell function; HOMA-IR, homeostatic assessment of insulin resistance; LB, low B-OHB; OGTT, oral glucose tolerance test; SBP, systolic blood pressure; \*, across gestation

ESM table 5. Dietary intake in pregnancy until 28 weeks gestation and correlation with B-OHB levels in all participants (normoglycaemic and with GDM)

|                           | Spearman's rho<br>(95%CI) | P-value |
|---------------------------|---------------------------|---------|
| Overall Energy (kJ/d)     | 0.09 (-0.12 – 0.29)       | 0.40    |
| Carbohydrate (g/d)        | 0.09 (-0.07 – 0.31)       | 0.40    |
| Carbohydrate (mg/kJ)      | 0.03 (-0.18 – 0.24)       | 0.75    |
| Sugars (g/d)              | 0.03 (-0.18 – 0.23)       | 0.80    |
| Starch (g/d)              | 0.12 (-0.09 – 0.32)       | 0.24    |
| Fibre (g/d)               | 0.14 (-0.06 – 0.35)       | 0.17    |
| Protein (g/d)             | 0.005 (-0.20 – 0.21)      | 0.96    |
| Total fat (g/d)           | 0.12 (-0.09 – 0.31)       | 0.27    |
| Saturated fat (g/d)       | 0.12 (-0.09 – 0.32)       | 0.23    |
| Polyunsaturated fat (g/d) | 0.09 (-0.12 – 0.29)       | 0.38    |
| Monounsaturated fat (g/d) | 0.11(-0.10 – 0.31)        | 0.31    |
